# Supplementary material for: Bacteria Induce Prolonged PMN Survival via a Phosphatidylcholine-Specific Phospholipase C- and Protein Kinase C-Dependent Mechanism
Source: PLOS journal article supplement (doi:10.1371/journal.pone.0087859), 2014-01-31

### Supporting information, Figure S1 (Related to Figure 2)

*Y. pseudotuberculosis* infection prevents SuperFasLigand-induced loss of mitochondrial potential. PMNs were left untreated or infected with YPIIIpc or pIB102 and treated with the apoptosis inducers for 12 h as described in Fig. 2. The mitochondrial potential was determined by flow cytometry using 1,1',3,3',3',3'-hexamethylindodicarbo-cyanine iodide (DiIC<sub>1</sub>(5)). Carbonyl cyanide 3-chlorophenylhydrazone (CCCP) (50  $\mu$ M) was used as positive control of low mitochondrial potential. One experiment representative of 4 performed is shown.

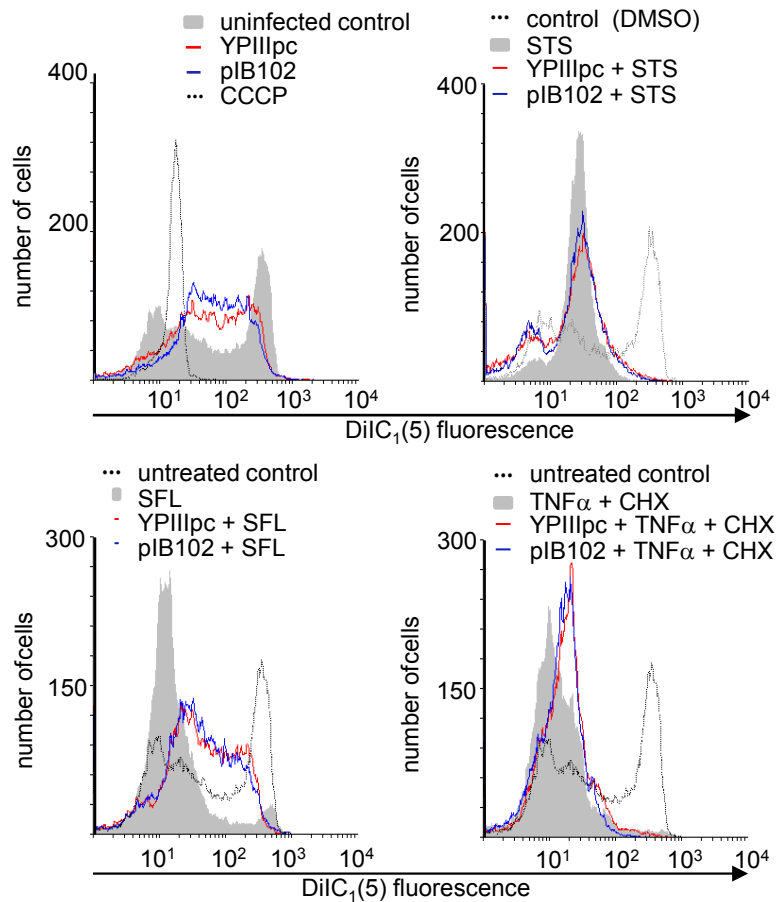

Supplement: S1 (10.1371/journal.pone.0087859.s001) [file journal.pone.0087859.s001]
